# Supplementary material for: Potassium octatitanate fibers induce persistent lung and pleural injury and are possibly carcinogenic in male Fischer 344 rats
Source: PubMed Central journal article supplement — Cancer Sci. 2018 Jun 22;109(7):2164–77. doi: 10.1111/cas.13643 (PMC6029824; doi:10.1111/cas.13643), 2018-06-22
Supplement: CAS-109-2164-s001.pdf [file CAS-109-2164-s001.pdf]

# Diameters and lengths of the materials used in this study.

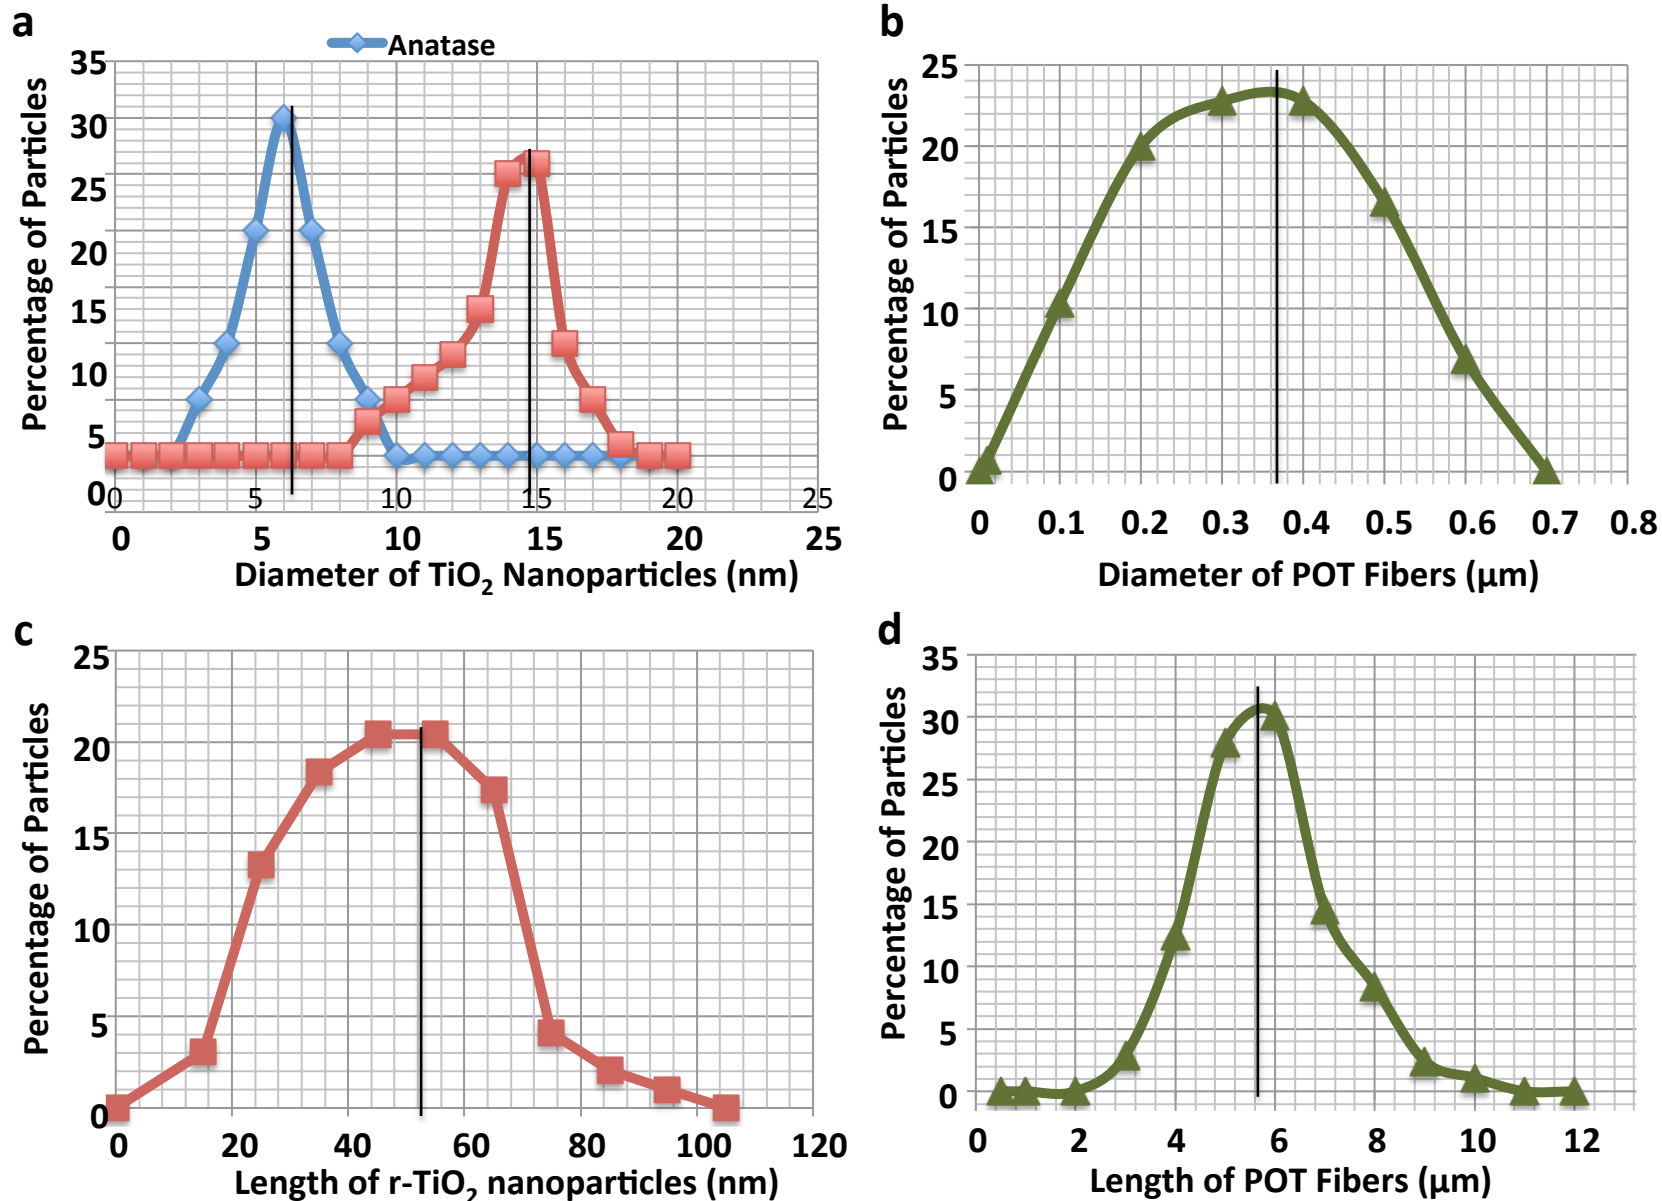

**Figure S1.** Diameters of a-nTiO<sub>2</sub> and r-nTiO<sub>2</sub> (a) and POT fibers (b). Lengths of r-nTiO<sub>2</sub> (c) and POT fibers (d).
