# Supplementary material for: Potassium octatitanate fibers induce persistent lung and pleural injury and are possibly carcinogenic in male Fischer 344 rats
Source: PubMed Central journal article supplement — Cancer Sci. 2018 Jun 22;109(7):2164–77. doi: 10.1111/cas.13643 (PMC6029824; doi:10.1111/cas.13643), 2018-06-22
Supplement: CAS-109-2164-s002.pdf [file CAS-109-2164-s002.pdf]

## PCNA staining of visceral mesothelial cells

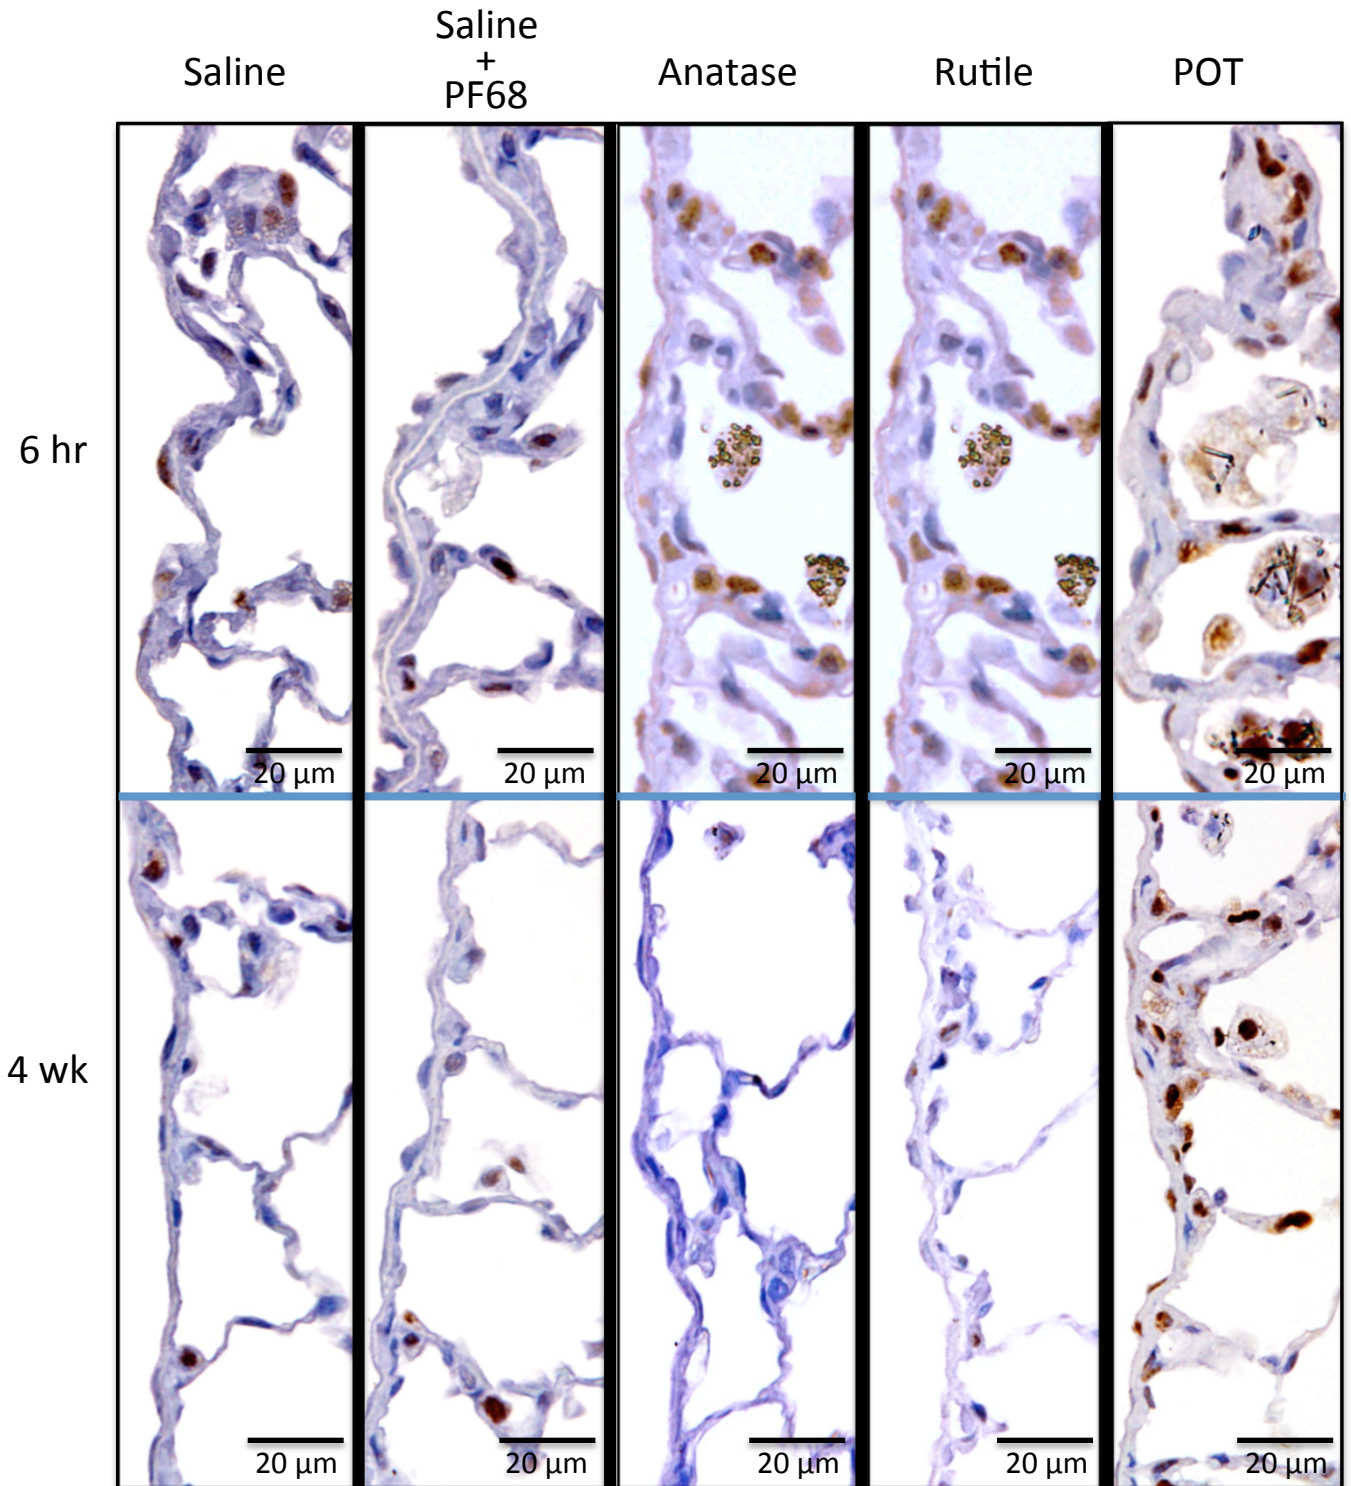

**Figure S2.** Proliferating cell nuclear antigen (PCNA) staining of visceral mesothelial cells at 6 hr and 4 wk after the last TIPS administration.
