# Supplementary material for: Potassium octatitanate fibers induce persistent lung and pleural injury and are possibly carcinogenic in male Fischer 344 rats
Source: PubMed Central journal article supplement — Cancer Sci. 2018 Jun 22;109(7):2164–77. doi: 10.1111/cas.13643 (PMC6029824; doi:10.1111/cas.13643), 2018-06-22
Supplement: CAS-109-2164-s003.pdf [file CAS-109-2164-s003.pdf]

# An area of hyperplasia in the visceral pleura of one of the POT fiber treated rats

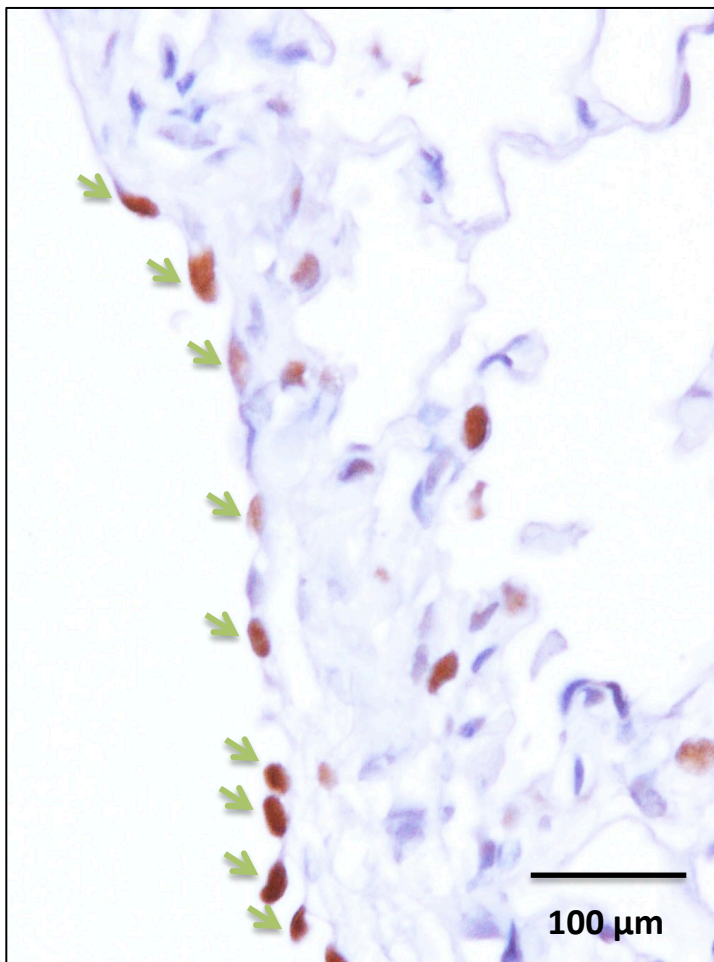

**Figure S3.** One of the POT treated rats developed hyperplasia of the visceral pleura 4 wks after the last TIPS administration. This area has a large number of PCNA positive visceral mesothelial cells (arrows).
