# Supplementary material for: Potassium octatitanate fibers induce persistent lung and pleural injury and are possibly carcinogenic in male Fischer 344 rats
Source: PubMed Central journal article supplement — Cancer Sci. 2018 Jun 22;109(7):2164–77. doi: 10.1111/cas.13643 (PMC6029824; doi:10.1111/cas.13643), 2018-06-22
Supplement: CAS-109-2164-s004.pdf [file CAS-109-2164-s004.pdf]

**Table S1. Alveolar macrophage and nanoparticle/fiber count in the lung.**

| Group                                                  | Alveolar macrophage count<br>(number/cm <sup>2</sup> of lung tissue) |            | Particle /fiber count<br>(number x 10 <sup>3</sup> /cm <sup>2</sup> of lung<br>tissue) |            |
|--------------------------------------------------------|----------------------------------------------------------------------|------------|----------------------------------------------------------------------------------------|------------|
|                                                        | 6 hr                                                                 | 4 wk       | 6 hr                                                                                   | 4 wk       |
| Untreated                                              | 5.53±0.50                                                            | 5.58±0.90  | -                                                                                      | -          |
| Saline                                                 | 8.98±0.91                                                            | 7.54±0.87  | -                                                                                      | -          |
| Saline plus PF68                                       | 11.30±2.37                                                           | 9.34±0.38  | -                                                                                      | -          |
| a-nTiO <sub>2</sub>                                    | 13.06±1.89                                                           | 11.60±0.99 | 11.93±1.057                                                                            | 1.39±0.59  |
| r-nTiO <sub>2</sub>                                    | 11.64±3.14                                                           | 11.38±2.59 | 11.52±0.329                                                                            | 0.69±0.35  |
| POT                                                    | 36.05±2.44                                                           | 16.25±1.62 | 28.43±2.452                                                                            | 15.16±4.05 |
| <b>P values between the POT group and other groups</b> |                                                                      |            |                                                                                        |            |
| POT & Untreated                                        | < 0.001                                                              | < 0.001    | -                                                                                      | -          |
| POT & Saline plus PF68                                 | < 0.001                                                              | < 0.001    | -                                                                                      | -          |
| POT & a-nTiO <sub>2</sub>                              | < 0.001                                                              | < 0.001    | < 0.001                                                                                | < 0.001    |
| POT & r-nTiO <sub>2</sub>                              | < 0.001                                                              | < 0.01     | < 0.001                                                                                | < 0.001    |

a-nTiO<sub>2</sub>: anatase type titanium dioxide nanoparticles; r-nTiO<sub>2</sub>: rutile type titanium dioxide nanoparticles; POT: potassium octatitanate fibers.

**Table S2. Proliferating cell nuclear antigen (PCNA) staining of lung tissue and visceral mesothelial cells.\***

| Group                                           | Pulmonary PCNA index |             | Pleural PCNA index |           |
|-------------------------------------------------|----------------------|-------------|--------------------|-----------|
|                                                 | 6 hr                 | 4 wk        | 6 hr               | 4 wk      |
| Untreated                                       | 11.53±4.38           | 11.13±2.16  | 0.68±0.01          | 0.68±0.03 |
| Saline                                          | 11.00±1.74           | 8.89±6.21   | 1.82±0.07          | 0.85±0.06 |
| Saline plus PF68                                | 13.05±5.32           | 10.70±0.37  | 2.30±0.43          | 0.96±0.02 |
| a-nTiO <sub>2</sub>                             | 25.43±8.77           | 28.00±11.96 | 3.49±0.34          | 1.12±0.27 |
| r-nTiO <sub>2</sub>                             | 15.93±2.96           | 12.27±4.01  | 2.15±0.43          | 0.96±0.21 |
| POT                                             | 35.30±6.10           | 41.67±3.08  | 4.62±0.99          | 5.90±1.90 |
| P values between the POT group and other groups |                      |             |                    |           |
| POT & Untreated                                 | < 0.001              | < 0.001     | < 0.001            | < 0.001   |
| POT & Saline plus PF68                          | < 0.001              | < 0.001     | < 0.001            | < 0.001   |
| POT & a-nTiO <sub>2</sub>                       | < 0.01               | < 0.01      | 0.01               | < 0.01    |
| POT & r-nTiO <sub>2</sub>                       | < 0.001              | < 0.001     | < 0.001            | < 0.001   |

\*Percentage of PCNA positive cells (mean ± SEM)

a-nTiO<sub>2</sub>: anatase type titanium dioxide nanoparticles; r-nTiO<sub>2</sub>: rutile type titanium dioxide nanoparticles; POT: potassium octatitanate fibers.

**Table S3. Proinflammatory cytokine gene expression.\***

| Group                                           | CCL2         |             | CCL3       |            | CCL4         |            |
|-------------------------------------------------|--------------|-------------|------------|------------|--------------|------------|
|                                                 | 6 hr         | 4 wk        | 6 hr       | 4 wk       | 6 hr         | 4 wk       |
| Untreated                                       | 251.23±65.43 | 50.57±6.28  | 9.75±0.54  | 17.71±0.97 | 40.55±2.65   | 2.67±0.54  |
| Saline                                          | 331.75±16.53 | 53.28±3.58  | 13.25±1.43 | 13.69±1.56 | 60.54±3.76   | 4.57±0.97  |
| Saline plus PF68                                | 310.06±15.43 | 38.44±11.54 | 18.21±1.76 | 15.83±1.56 | 32.75±2.45   | 2.69±0.05  |
| a-nTiO <sub>2</sub>                             | 301.68±51.23 | 40.08±4.68  | 12.52±4.06 | 17.46±4.57 | 94.03±6.35   | 3.079±0.67 |
| r-nTiO <sub>2</sub>                             | 542.16±93.19 | 47.67±7.54  | 8.44±0.87  | 18.86±1.97 | 101.64±10.51 | 10.82±0.13 |
| POT                                             | 180.53±10.01 | 89.84±13.54 | 32.8±6.97  | 19.39±3.48 | 59.36±3.54   | 7.53±0.49  |
| P values between the POT group and other groups |              |             |            |            |              |            |
| POT & Untreated                                 | 0.684        | < 0.01      | < 0.001    | 0.876      | < 0.01       | < 0.001    |
| POT & Saline plus PF68                          | 0.0834       | < 0.001     | < 0.001    | 0.771      | < 0.05       | < 0.001    |
| POT & a-nTiO <sub>2</sub>                       | 0.354        | < 0.001     | < 0.001    | 0.985      | 0.548        | < 0.001    |
| POT & r-nTiO <sub>2</sub>                       | < 0.05       | < 0.001     | < 0.001    | 0.899      | 0.685        | < 0.01     |

\*RNA is expression in arbitrary units relative to beta-actin (mean ± SEM)

a-nTiO<sub>2</sub>: anatase type titanium dioxide nanoparticles; r-nTiO<sub>2</sub>: rutile type titanium dioxide nanoparticles; POT: potassium octatitanate fibers.

**Table S4. CCL2 protein expression.**

| Group                     | CCL2 (pg/mg lung tissue) |            |
|---------------------------|--------------------------|------------|
|                           | 6 hr                     | 4 wk       |
| Untreated                 | 10.69±3.01               | 22.14±3.09 |
| Saline                    | 13.70±6.87               | 20.89±5.80 |
| Saline plus PF68          | 12.32±6.69               | 17.38±1.79 |
| a-nTiO <sub>2</sub>       | 13.82±9.62               | 18.62±6.87 |
| r-nTiO <sub>2</sub>       | 27.35±5.06               | 18.11±4.14 |
| POT                       | 11.82±4.95               | 31.92±8.28 |
| POT & Untreated           | 0.59                     | < 0.05     |
| POT & Saline plus PF68    | 0.69                     | < 0.001    |
| POT & a-nTiO <sub>2</sub> | 0.88                     | < 0.01     |
| POT & r-nTiO <sub>2</sub> | < 0.01                   | < 0.01     |

a-nTiO<sub>2</sub>: anatase type titanium dioxide nanoparticles; r-nTiO<sub>2</sub>: rutile type titanium dioxide nanoparticles; POT: potassium octatitanate fibers.

**Table S5. Lung tissue oxidant parameters.\***

| Group                                                  | TOS         |            | TAC       |           | OSI        |           |
|--------------------------------------------------------|-------------|------------|-----------|-----------|------------|-----------|
|                                                        | 6 hr        | 4 wk       | 6 hr      | 4 wk      | 6 hr       | 4 wk      |
| Untreated                                              | 12.49±2.04  | 13.18±3.30 | 3.45±0.29 | 3.80±0.38 | 3.69±0.87  | 3.48±3.30 |
| Saline                                                 | 13.35±1.80  | 12.97±1.85 | 3.81±0.21 | 3.53±0.26 | 3.49±0.35  | 3.70±1.85 |
| Saline plus PF68                                       | 14.23±1.81  | 13.35±2.14 | 3.71±0.36 | 3.70±0.39 | 3.83±0.42  | 3.59±2.14 |
| a-nTiO <sub>2</sub>                                    | 37.15±15.79 | 16.69±4.64 | 3.35±0.34 | 3.42±0.60 | 10.88±3.72 | 4.89±4.64 |
| r-nTiO <sub>2</sub>                                    | 20.81±8.83  | 13.23±2.75 | 3.26±0.14 | 3.65±0.27 | 6.40±2.72  | 3.63±2.75 |
| POT                                                    | 34.71±14.16 | 28.57±4.44 | 3.58±0.35 | 3.66±0.27 | 9.64±3.56  | 7.89±4.44 |
| <b>P values between the POT group and other groups</b> |             |            |           |           |            |           |
| POT & Untreated                                        | < 0.001     | < 0.001    | 0.20      | 0.24      | < 0.001    | < 0.001   |
| POT & Saline plus PF68                                 | <0.001      | < 0.001    | 0.24      | 0.42      | < 0.001    | < 0.001   |
| POT & a-nTiO <sub>2</sub>                              | 0.37        | < 0.001    | 0.10      | 0.19      | 0.25       | < 0.01    |
| POT & r-nTiO <sub>2</sub>                              | < 0.05      | < 0.001    | < 0.05    | 0.46      | < 0.05     | < 0.001   |

\*Total oxidant status (TOS) is expressed as  $\mu\text{mol H}_2\text{O}_2$  equivalents per gram of tissue, total antioxidant capacity (TAC) is expressed as  $\mu\text{mol Trolox}$  equivalents per gram of tissue, and Oxidative stress index (OSI) is expressed as the ratio of TOS to TAC.

a-nTiO<sub>2</sub>: anatase type titanium dioxide nanoparticles; r-nTiO<sub>2</sub>: rutile type titanium dioxide nanoparticles; POT: potassium octatitanate fibers.

**Table S6. LDH, ALP, and total protein in the bronchioalveolar lavage at 4 wk.**

| Group                                           | LDH activity (U/L)   | ALP activity ( $\mu$ unit/l) | Total Protein ( $\mu$ g/ml) |
|-------------------------------------------------|----------------------|------------------------------|-----------------------------|
| Untreated                                       | 909.35 $\pm$ 323.81  | 148.71 $\pm$ 11.69           | 117.87 $\pm$ 19.37          |
| Saline                                          | 927.94 $\pm$ 369.06  | 161.73 $\pm$ 19.31           | 119.08 $\pm$ 10.67          |
| Saline plus PF68                                | 794.06 $\pm$ 246.86  | 139.34 $\pm$ 13.08           | 106.00 $\pm$ 8.20           |
| a-nTiO <sub>2</sub>                             | 2132.88 $\pm$ 781.94 | 455.49 $\pm$ 33.10           | 131.25 $\pm$ 29.98          |
| r-nTiO <sub>2</sub>                             | 1130.16 $\pm$ 609.08 | 245.37 $\pm$ 10.44           | 125.09 $\pm$ 13.69          |
| POT                                             | 2243.05 $\pm$ 515.44 | 526.58 $\pm$ 139.09          | 135.75 $\pm$ 17.63          |
| P values between the POT group and other groups |                      |                              |                             |
| POT & Untreated                                 | <0.001               | <0.001                       | 0.088                       |
| POT & Saline plus PF68                          | <0.01                | <0.001                       | <0.05                       |
| POT & a-nTiO <sub>2</sub>                       | 0.410                | 0.179                        | 0.402                       |
| POT & r-nTiO <sub>2</sub>                       | <0.05                | <0.01                        | 0.188                       |

LDH: Lactate dehydrogenase; ALP: alkaline phosphatase; a-nTiO<sub>2</sub>: anatase type titanium dioxide nanoparticles; r-nTiO<sub>2</sub>: rutile type titanium dioxide nanoparticles; POT: potassium octatitanate fibers.

**Table S7. LDH and total protein in the pleural cavity lavage.**

| Group                                           | LDH activity (U/L)  |                      | Total Protein ( $\mu$ g/ml) |                     |
|-------------------------------------------------|---------------------|----------------------|-----------------------------|---------------------|
|                                                 | 6 hr                | 4 wk                 | 6 hr                        | 4 wk                |
| Untreated                                       | 963.11 $\pm$ 432.80 | 1056.31 $\pm$ 308.29 | 64.95 $\pm$ 48.18           | 105.36 $\pm$ 52.33  |
| Saline                                          | 696.43 $\pm$ 202.25 | 1076.35 $\pm$ 455.17 | 87.13 $\pm$ 12.79           | 89.24 $\pm$ 69.05   |
| Saline plus PF68                                | 682.99 $\pm$ 420.35 | 918.20 $\pm$ 329.32  | 81.97 $\pm$ 17.12           | 106.92 $\pm$ 33.25  |
| a-nTiO <sub>2</sub>                             | 697.67 $\pm$ 99.18  | 1815.12 $\pm$ 611.04 | 127.49 $\pm$ 46.89          | 289.83 $\pm$ 140.56 |
| r-nTiO <sub>2</sub>                             | 741.08 $\pm$ 203.16 | 1515.50 $\pm$ 747.41 | 98.97 $\pm$ 51.28           | 160.32 $\pm$ 27.56  |
| POT                                             | 751.01 $\pm$ 92.82  | 1876.58 $\pm$ 729.54 | 130.96 $\pm$ 60.59          | 218.59 $\pm$ 109.46 |
| P values between the POT group and other groups |                     |                      |                             |                     |
| POT & Untreated                                 | 0.098               | <0.01                | 0.304                       | 0.235               |
| POT & Saline plus PF68                          | 0.219               | <0.01                | 0.368                       | <0.05               |
| POT & a-nTiO <sub>2</sub>                       | 0.207               | 0.438                | 0.190                       | 0.452               |
| POT & r-nTiO <sub>2</sub>                       | 0.297               | 0.208                | 0.233                       | 0.159               |

LDH: Lactate dehydrogenase; a-nTiO<sub>2</sub>: anatase type titanium dioxide nanoparticles; r-nTiO<sub>2</sub>: rutile type titanium dioxide nanoparticles; POT: potassium octatitanate fibers.
